# 1 **Impoverished auditory cues limit engagement of brain** 2 **networks controlling spatial selective attention**

3 Authors: Yuqi Deng<sup>1</sup>, Inyong Choi<sup>2</sup>, Barbara Shinn-Cunningham<sup>1,3</sup>, Robert Baumgartner<sup>1,4\*</sup>

4 Affiliations:

5 <sup>1</sup> Biomedical Engineering, Boston University, Boston, MA 02215, USA

6 <sup>2</sup> Communication Sciences & Disorders, University of Iowa, Iowa City, IA 52242, USA

7 <sup>3</sup> Neuroscience Institute, Carnegie Mellon University, Pittsburgh, PA 15213 USA

8 <sup>4</sup> Acoustics Research Institute, Austrian Academy of Sciences, 1040 Vienna, Austria

9 \* Corresponding Author: [robert.baumgartner@oeaw.ac.at](mailto:robert.baumgartner@oeaw.ac.at)

10 Author contributions: R.B., B.S.-C., Y.D., and I.C. designed research; Y.D. and R.B. performed  
11 research; Y.D. and R.B. analyzed data; and Y.D., R.B., B.S.-C., and I.C. wrote the paper.

12 The authors have no competing interests to declare.

13 **Abstract**

14 Spatial selective attention enables listeners to process a signal of interest in natural settings. However,  
15 most past studies on auditory spatial attention used impoverished spatial cues: presenting competing  
16 sounds to different ears, using only interaural differences in time (ITDs) and/or intensity (IIDs), or using  
17 non-individualized head-related transfer functions (HRTFs). Here we tested the hypothesis that  
18 impoverished spatial cues impair spatial auditory attention by only weakly engaging relevant cortical  
19 networks. Eighteen normal-hearing listeners reported the content of one of two competing syllable  
20 streams simulated at roughly +30° and -30° azimuth. The competing streams consisted of syllables from  
21 two different-sex talkers. Spatialization was based on natural spatial cues (individualized HRTFs),  
22 individualized IIDs, or generic ITDs. We measured behavioral performance as well as  
23 electroencephalographic markers of selective attention. Behaviorally, subjects recalled target streams  
24 most accurately with natural cues. Neurally, spatial attention significantly modulated early evoked  
25 sensory response magnitudes only for natural cues, not in conditions using only ITDs or IIDs. Consistent  
26 with this, parietal oscillatory power in the alpha band (8-14 Hz; associated with filtering out distracting  
27 events from unattended directions) showed significantly less attentional modulation with isolated spatial  
28 cues than with natural cues. Our findings support the hypothesis that spatial selective attention networks  
29 are only partially engaged by impoverished spatial auditory cues. These results not only suggest that  
30 studies using unnatural spatial cues underestimate the neural effects of spatial auditory attention, they also  
31 illustrate the importance of preserving natural spatial cues in assistive listening devices to support robust  
32 attentional control.

33 **Keywords:** auditory spatial selective attention, head-related transfer functions, electroencephalography

## 34 **1 Introduction**

35 Spatial hearing is crucial to selectively attend to sounds of interest in everyday social settings. The  
36 remarkable ability of normal-hearing listeners to focus on a sound source within a complex acoustic scene  
37 is often referred to as “the cocktail party phenomenon,” and has a rich history (Cherry, 1953).  
38 Nevertheless, the mechanisms controlling spatial selective attention are still poorly understood.  
39 Acoustically, in everyday situations, the two ears provide the listener with a listener-specific combination  
40 of spatial cues that include interaural time and intensity differences (ITDs and IIDs, respectively), as well  
41 as spectral cues caused by acoustical filtering of the pinnae (Blauert, 1997a). Together, these cues,  
42 captured by individualized head-related transfer functions (HRTFs), allow the brain to create a clear,  
43 punctate internal representation of the location of sound sources in the environment (Majdak et al., 2018;  
44 Middlebrooks, 2015).  
45 When only isolated or impoverished spatial cues are present, auditory localization performance degrades  
46 and the natural perception of external auditory objects may even collapse into the listener’s head  
47 (Baumgartner et al., 2017; Callan et al., 2013; Cubick et al., 2018; Hartmann and Wittenberg, 1996).  
48 Nevertheless, degraded or isolated ITDs and IIDs still create a strong sense of lateralization within the  
49 head; moreover, even highly impoverished spatial cues can be used to achieve spatial release from  
50 speech-on-speech masking, behaviorally (Cubick et al., 2018; Culling et al., 2004; Ellinger et al., 2017;  
51 Glyde et al., 2013; Kidd et al., 2010; Loisel et al., 2016). The relative importance of ITDs and IIDs in  
52 spatial release from masking remains unclear, with past studies reporting conflicting results when directly  
53 comparing different binaural conditions (Ellinger et al., 2017; Glyde et al., 2013; Higgins et al., 2017;  
54 Shinn-Cunningham et al., 2005). More importantly, it is a puzzle as to why realistic and degraded spatial  
55 cues yield at best small behavioral differences in masking release even though spatial perception is clearly  
56 degraded when cues are impoverished (e.g., Cubick et al., 2018).  
57 Previous electroencephalography (EEG) and magnetoencephalography (MEG) studies have demonstrated  
58 that rich spatial cues in sound stimuli lead to different cortical activity compared to using isolated cues

Deng et al.

Spatial attention with impoverished auditory cues

59 during sound localization (Callan et al., 2013; Leino et al., 2007; Palomäki et al., 2005) and auditory  
60 motion processing (Getzmann and Lewald, 2010). However, the apparently minor behavioral  
61 consequences of using unnatural, non-individualized spatial cues on spatial release from masking,  
62 combined with the ease of implementing studies with simple, non-individualized spatial cues, led to their  
63 wide usage in auditory neuroscience studies (Cusack et al., 2001; Dahmen et al., 2010; Dai et al., 2018;  
64 Itoh et al., 2000; Kong et al., 2014; Sach et al., 2000). Indeed, in the auditory neuroscience literature,  
65 many studies did not even present true binaural signals, but instead studied “spatial” attention by using  
66 dichotic signals, with one sound presented monaurally to one ear and a competing sound presented  
67 monaurally to the other ear (Ahveninen et al., 2011; Alho et al., 1999b; Das et al., 2016; Wöstmann et al.,  
68 2016). These studies implicitly assumed that because listeners were able to use impoverished spatial cues  
69 to listen to one sound from a particular (relative) direction, the cognitive networks responsible for  
70 controlling spatial attention must be engaged just as they are when listening to rich, natural spatial cues.  
71 Nonetheless, it is unclear whether and how engagement of higher-order cognitive processes such as  
72 deployment of selective attention is affected by the use of unnatural or impoverished spatial cues.  
73 Modulation of neural signatures, such as event-related potentials (ERPs) and induced oscillatory activity,  
74 is often taken as evidence of effective attentional control (Herrmann and Knight, 2001; Siegel et al.,  
75 2012). In particular, auditory spatial attention is known to modulate early sensory ERPs in the N1 time  
76 range (processing latencies of 100 to 150 ms; see Choi et al., 2013; Röder et al., 1999), whereas  
77 modulation of P1 ERPs (50 to 100 ms) has only recently been demonstrated in a free field experiment  
78 (Giuliano et al., 2014). Induced alpha oscillation (8 to 14 Hz) has been hypothesized to function as an  
79 information gating mechanism (Klimesch et al., 2007). During auditory spatial attention, parietal alpha  
80 power often decreases in the contralateral hemisphere of attended stimuli and/or increases in the  
81 ipsilateral hemisphere (Banerjee et al., 2011; Lim et al., 2015; Wöstmann et al., 2016). These neural  
82 modulations constitute objective metrics of the efficacy of attentional control.

83 Here, we test listeners in a selective attention paradigm with simultaneous, spatially separated talkers. We  
84 use the aforementioned EEG measures to compare both perceptual ability and the neural signatures of  
85 attentional control for simulations with impoverished vs. natural spatial cues. Eighteen subjects performed  
86 an auditory spatial attention task with two competing streams located at roughly +30 ° and -30° azimuth  
87 (Figure 1). On every trial, listeners were cued by an auditory cue to attend to either the left or right stream  
88 and report the content of the cued stream. The competing streams consisted of syllables (/ba/, /da/ or /ga/)  
89 from two different-sex talkers. Sound stimuli (including the cuing sound) were spatialized using three  
90 different levels of naturalness and richness: 1) generic ITDs only, 2) individualized IIDs, or 3)  
91 individualized HRTFs containing all of the naturally occurring spatial cues a listener experiences in the  
92 everyday world. We show that behavioral performance is better when listeners hear natural,  
93 individualized spatial cues than when they hear impoverished cues. Importantly, only natural spatial cues  
94 yield significant attentional modulation of P1 amplitudes. Moreover, induced alpha activity is less robust  
95 and poorly lateralized with isolated spatial cues compared to rich, natural spatial cues.

## 96 **2 Materials and Methods**

### 97 *2.1 Subjects*

98 Twenty-one paid volunteers and one author within the age of 18-42 years ( $M = 22.9$ ,  $SD = 5.5$ ;  
99 12 females, 10 males) participated in this study. None of the subjects had audiometric thresholds greater  
100 than 20 dB for frequencies from 250 Hz to 8 kHz. All participants gave informed consent as approved by  
101 the Boston University Institutional Review Board. Two subjects were withdrawn from the study due to  
102 the inability to perform the task (percentage of correct response less than 30% after training), and two  
103 subjects were removed during EEG data preprocessing due to excessive artifacts. Therefore 18 subjects  
104 remained for further analysis ( $N = 18$ ).

### 105 *2.2 Stimuli and Procedure*

106 The sound stimuli consisted of consonant-vowel syllables (/ba/, /da/, & /ga/), each 0.4 s in duration. These  
107 syllables were recorded from three talkers that naturally differed in fundamental frequency (F0). Details  
108 on stimulus are provided in Stimulus Presentation. Cue and stimuli were presented via earphones (ER-2,  
109 Etymotic Research, Inc.) and spatialized to approximately  $\pm 30^\circ$  azimuth ( $0^\circ$  elevation). Three different  
110 spatialization conditions were used: HRTF, IID, and ITD. In the HRTF condition, individualized HRTFs,  
111 providing natural combinations of ITDs, IIDs, and spectral cues, were used (See Individual HRTF  
112 Measurement for measurement methods). In the IID condition, ITDs were removed from the  
113 individualized HRTFs by computing minimum-phase representations of the filters via removing the non-  
114 causal part of the cepstrum. Hence, the IID and HRTF conditions provided the same monaural magnitude  
115 spectra and thus the same energetic advantage of the ear ipsilateral to the target while differing in spatial  
116 perception. In the ITD condition, spatialization was based on simply delaying the signal presented to the  
117 contralateral ear by 300  $\mu$ s, thus providing no energetic advantage to the ipsilateral ear. This spatialization  
118 method was tested due to its popularity in auditory neuroscience.

119 The auditory cue was a single syllable /ba/ spoken by a low-pitch male voice ( $F_0 = 91$  Hz, estimated by  
120 Praat software) (Boersma, 2001). The following target and distractor streams both consisted of three  
121 syllables randomly chosen out of the set of three syllables (with replacement). The target stream was  
122 spoken by either a female ( $F_0 = 189$  Hz) or a high-pitch male talker ( $F_0 = 125$  Hz), and the distractor  
123 stream was spoken by the other talker different than the target stream. The first syllable of the target and  
124 distractor sound overlapped in time, while the latter two syllables were separated by 200 ms, onset to  
125 onset (Figure 1). To avoid engagement of temporal attention rather than spatial attention, the assignment  
126 of the target stream being leading or lagging was equally distributed across trials. In the leading stream,  
127 the onsets of all three syllables were separated by 400 ms; in the lagging stream, the onsets of the first and  
128 the second syllable were separated by 600 ms, whereas those of the second and the third syllable were  
129 separated by 400 ms. All sound stimuli were presented at a sound pressure level of approximately 75 dB.

Figure 1

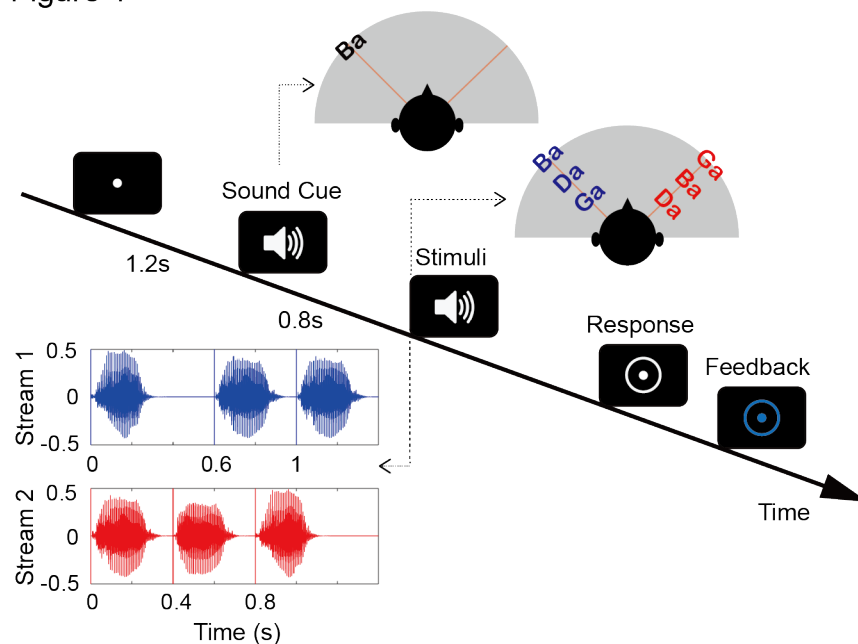

130

131 **Fig. 1.** Auditory spatial attention task with two competing streams was used to assess the

132 consequence of impoverished auditory spatial cues on neural proxies of attention control. An

133 *auditory cue was presented first from the location of the upcoming target stream, processed by the*  
134 *same spatialization scheme as the upcoming mixture. Following the cue, the competing streams*  
135 *began, one from around +30° the other from around -30° azimuth. Listeners were asked to recall*  
136 *the syllable sequence presented from the cued side. The first syllables of both streams were*  
137 *temporally aligned; however, the latter two syllables in the competing streams were staggered,*  
138 *enabling us to isolate neural responses to each. Feedback was provided after every trial.*

### 139 *2.3 Task*

140 Subjects performed a spatial attention task in a Posner paradigm (Figure 1) (Posner et al., 1980). Sound  
141 spatialization was realized by one of the three spatialization conditions fixed within trials but pseudo-  
142 randomized across trials. Subjects were instructed to fixate their gaze on a dot at the center of the screen  
143 at the beginning of each trial. The fixation dot lasted for 1.2 s before an auditory cue was presented. The  
144 auditory cue came from either left or right indicating where the target sound would come from. A target  
145 sound started 0.8 s later from the cued location. At the same time a distractor sound started from the  
146 opposite location of the target sound. Subjects were asked to report the syllable sequence of the target  
147 sound by pressing a keyboard after the sounds finished and a response cue was shown. Feedback about  
148 whether or not they correctly reported the syllables was given at the end of every trial.

149 Each subject performed 450 randomized trials of this task, divided into 9 blocks each consisting of 50  
150 trials. In total, every subject performed 150 trials for each of the three sound spatialization conditions  
151 (75 trials attending left and 75 trials attending right). Prior to the test sessions, all participants received a  
152 practice session to get familiarized with the task. Participants with a percentage of correct response lower  
153 than 30% after 3 blocks of training (50 trials per block) were excluded from the study.

### 154 *2.4 EEG Acquisition and Preprocessing*

155 32-channel scalp EEG data was recorded (Activetwo system with Activeview acquisition software,  
156 Biosemi B.V.) in a sound proof booth (Eckel Industries, Inc.) while subjects were performing the task.



157 Two additional reference electrodes were placed on the earlobes. Horizontal eye movements were  
158 recorded by two electrooculography (EOG) electrodes placed on the outer canthi of each eye. Vertical eye  
159 movement was recorded by one EOG electrode placed below the right eye. The timing of stimulus was  
160 controlled by Matlab (Mathworks) with Psychtoolbox (extension 3) (Brainard, 1997).

161 EEG preprocessing was conducted in Matlab with Eeglab toolbox (Delorme and Makeig, 2004). EEG  
162 data were corrected against the average of the two reference channels. Bad channels were marked by  
163 manual selection during recording and automatically detected based on joint probability measures of  
164 Eeglab. EEG signals were then down-sampled to 256 Hz and epochs containing responses to individual  
165 trials were extracted. Each epoch was baseline corrected against 100 ms prior to the cue onset by  
166 removing the mean of the baseline period from the whole trial. ICA artifact rejection was performed with  
167 Eeglab to remove components of eye movements, blinks, and muscle artifacts. The maximum number of  
168 independent components rejected for each subject was five. After ICA rejection, bad channels were  
169 removed and interpolated. Trials with a maximum absolute value over 80  $\mu$ V were rejected (Delorme et  
170 al., 2007). Two subjects with excessive artifacts were removed from further EEG analysis because less  
171 than 50% of trials remained after thresholding. For the rest of the 18 subjects, at least about two thirds of  
172 the trials (minimum was 48 out of 75 trials) remained for each condition after artifact rejection. Trial  
173 numbers were equalized within and across subjects by randomly selecting the minimum number of  
174 available trials ( $N = 48$ ) for each condition across the whole recording session.

### 175 *2.5 Data analysis*

176 Behavioral performance was quantified by the percentage of correct responses for every one of the three  
177 syllables in the target stream and each spatialization condition. Behavioral results were collapsed across  
178 the attend-left and attend-right trials. The percentages of correct response were then normalized by logit  
179 transformation before parametric statistical testing was performed on the resulting data.

180 ERP responses were evaluated for the second syllable of the target sound and distractor sound,  
181 respectively. The reason we looked at the second syllable only is that 1) the first syllable of the target and  
182 distractor aligned in time and therefore the ERPs were inseparable, and 2) the ERP amplitude in response  
183 to the third syllable was small, and therefore more contaminated by noise. ERP components were then  
184 extracted from the time series data. The preprocessed data (details see EEG Preprocessing Procedures)  
185 was bandpass filtered from 0.5 to 20 Hz by a finite impulse response filter with Kaiser window design ( $\beta$   
186 = 7.2,  $n = 1178$ ). Data from four fronto-central channels (Cz, Fz, FC1, and FC2) were averaged to get the  
187 auditory ERP response. We picked these four channels a priori because auditory ERP responses in sensor  
188 space are largest in the fronto-central area of the scalp. To quantify the amplitudes of ERP components,  
189 the maximum value within the window of 50 to 100 ms after the second syllable onset was taken to be the  
190 P1 amplitude; the minimum value within the window of 100 to 180 ms after the second syllable onset was  
191 calculated to be the N1 amplitude. The values extracted from the selected windows were calculated for  
192 each channel and plotted onto a 2D scalp map to generate topography plots. The values of the ERP  
193 components from the four selected channels were then averaged and compared across different  
194 spatialization conditions.

195 To get the amplitude of alpha oscillation, the preprocessed EEG data was bandpass filtered to the alpha  
196 range (8 to 14 Hz) before a Hilbert transform was applied. The magnitude of the resulting data was taken  
197 as the extracted alpha power envelope. To get induced alpha power, the alpha power was calculated for  
198 single trials first and then averaged across trials (Snyder and Large, 2005). The time course of alpha  
199 power was baseline corrected against 700 ms before the auditory cue onset. GFP (Murray et al., 2008;  
200 Skrandies, 1990) constitutes the spatial standard deviation across all scalp electrodes; it has been used as a  
201 measurement to quantify the amount of alpha variation across the scalp (Lim et al., 2015). We calculated  
202 the time courses of alpha GFP by taking the standard deviation of all electrodes. To quantify the degree of  
203 alpha modulation based on direction of attention, we calculated the Attentional Modulation Index (AMI)  
204 of alpha power, defined as the alpha power difference between attended left and attended right trials

205 divided by the overall alpha power (Wöstmann et al., 2016). The AMI of alpha was calculated for each  
206 time point, yielding the time course of AMI for each spatialization condition. We then averaged the alpha  
207 AMI of each spatialization condition over the 800 ms immediately before stimulus onset (-800 ms to  
208 0 ms, re: onset). This is the period where subjects have been cued to orient their spatial attention in  
209 preparation for the target sound, but before the speech streams begin. Scalp topographies of the  
210 preparatory alpha AMI were plotted for each condition. Hemispheric lateralization of alpha AMI was  
211 further compared across spatialization conditions and evaluated as the difference between the left  
212 hemisphere and the right hemisphere. Calculated in this way, the AMI is expected to be positive in left  
213 and negative in right parietal channels.

214 For testing the significance of different means across conditions, we conducted repeated measures  
215 ANOVAs followed by post-hoc analyses for all significant main effects and interactions using Fisher's  
216 least significant difference procedure. We separately tested whether condition means differed  
217 significantly from zero using Bonferroni-corrected t-tests ( $P_{adj}$ ). The Lilliefors test was performed prior to  
218 statistical testing to check normality of the data. Data was considered normally distributed at  $P > 0.05$ .  
219 Prior to statistical analysis of behavioral performance, the percentages of correctly reported syllable were  
220 logit transformed in order to obtain normally distributed data.

## 221 3 Results

### 222 3.1 Natural spatial cues facilitate behavioral performance

223 Percentages of correctly recalling each syllable of the target stream differed across the three spatialization  
 224 conditions (Figure 2; 1<sup>st</sup> syllable:  $F_{(2,34)} = 25.25$ ,  $P < 0.001$ ; 2<sup>nd</sup> syllable:  $F_{(2,34)} = 6.27$ ,  $P = 0.005$ ; 3<sup>rd</sup>  
 225 syllable:  $F_{(2,34)} = 5.60$ ,  $P = 0.008$ ). For the first syllable, where the target and distractor sounds overlapped  
 226 in time, subjects were least accurate in the ITD condition compared to the IID condition ( $t_{(34)} = 5.31$ ,  
 227  $P < 0.001$ ) and HRTF condition ( $t_{(34)} = 6.74$ ,  $P < 0.001$ ). However, no statistically significant difference  
 228 was observed between IID and HRTF conditions for that syllable ( $t_{(34)} = 1.43$ ,  $P = 0.16$ ). For the second  
 229 and the third syllable, where target and distractor streams occurred staggered in time, subjects performed  
 230 better in the HRTF condition than in both the ITD condition (2<sup>nd</sup> syllable:  $t_{(34)} = 3.27$ ,  $P = 0.002$ ;  
 231 3<sup>rd</sup> syllable:  $t_{(34)} = 3.33$ ,  $P = 0.002$ ) and the IID condition (2<sup>nd</sup> syllable:  $t_{(34)} = 2.81$ ,  $P = 0.008$ ; 3<sup>rd</sup> syllable:  
 232  $t_{(34)} = 1.94$ ,  $P = 0.06$ ). There was no significant difference between the ITD and IID conditions for the two  
 233 staggered syllables (2<sup>nd</sup> syllable:  $t_{(34)} = 1.41$ ,  $P = 0.17$ ; 3<sup>rd</sup> syllable:  $t_{(34)} = 1.39$ ,  $P = 0.17$ ).

Figure 2

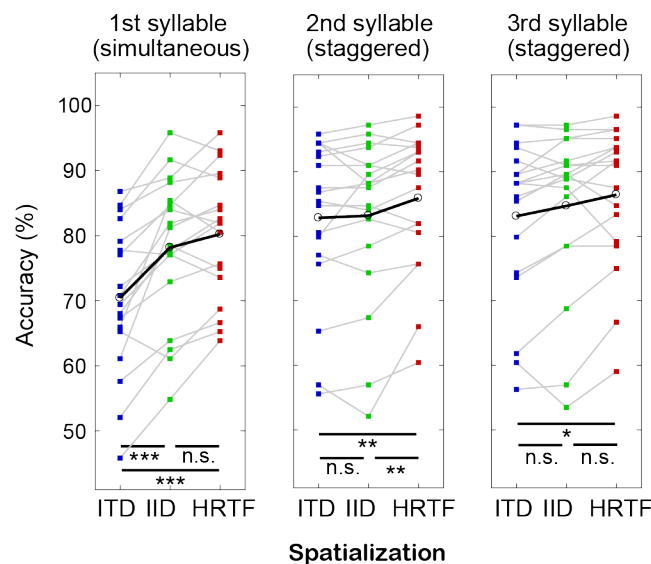

234

235 **Fig. 2.** Listeners' ( $N = 18$ ) recall performance was evaluated for every syllable and different

236 spatialization conditions. Sounds were spatialized either based on generic ITDs,

237 *individualized IIDs, or the natural combination of ITDs, IIDs, and spectral cues in*  
238 *individualized HRTFs. Behavioral advantages of having more consistent spatial information*  
239 *were significant but small. \*  $P < .05$ ; \*\*  $P < .001$ ; \*\*\*  $P < .0001$*

### 240 *3.2 Impoverished spatial cues affect attentional modulation of ERPs*

241 Figure 3A shows the ERPs evoked by the onset of the second syllable of the attended target sound and the  
242 unattended distractor sound, aligning the onsets of the target and distractor syllables to 0 s to allow direct  
243 comparison. Stimulus onsets elicited a fronto-central positivity (P1) between 50 to 100 ms followed by a  
244 negativity (N1) between 100 to 180 ms (Figure 3A-B). The amplitudes of these two components were  
245 extracted and the difference between attended stimuli (target sound) and unattended stimuli (distractor  
246 sound) was calculated in order to quantify attentional modulation for both the P1 and N1 components  
247 (Figure 3C).

Figure 3

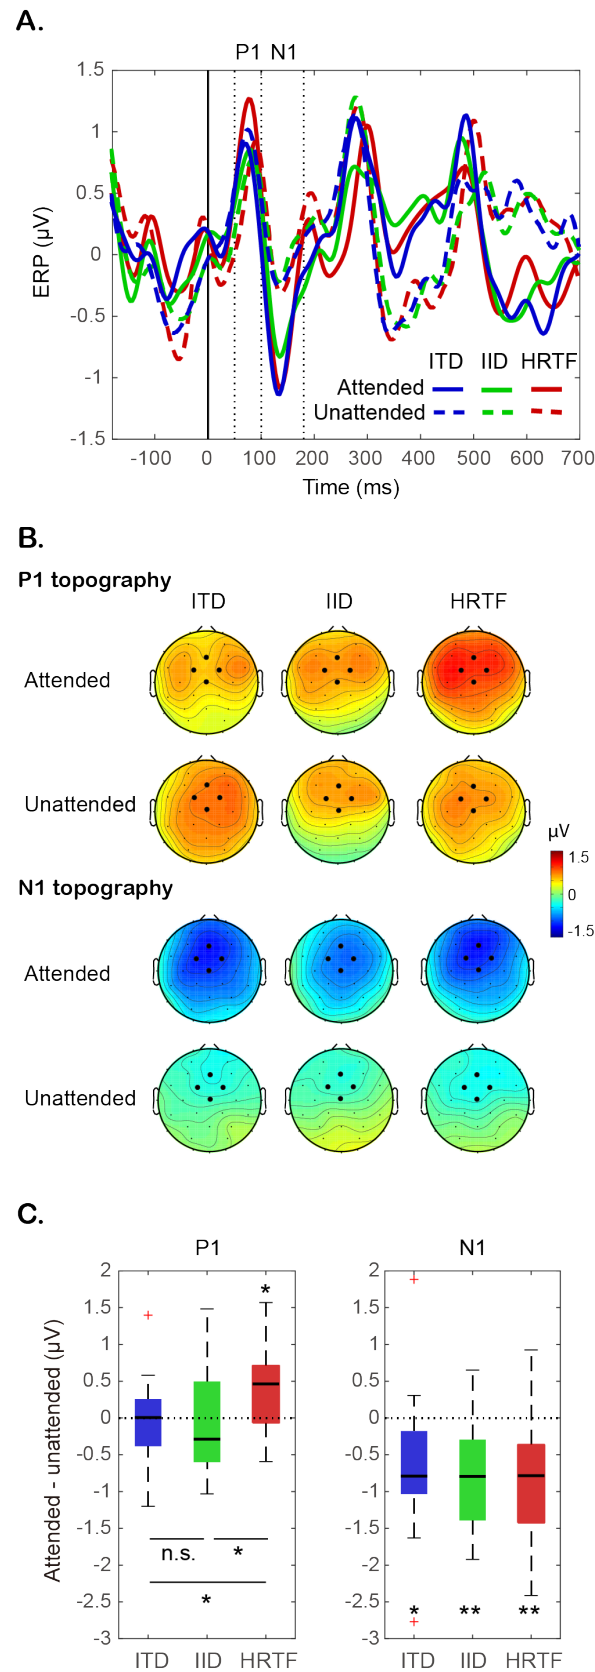

249

250 **Fig. 3.** *P1 amplitudes were only modulated by the direction of attention in the HRTF condition,*  
251 *whereas N1 amplitudes were modulated equivalently across spatialization conditions (N = 18).*

252 **A.** *ERP waveforms at fronto-central electrodes were compared between the attended target stream*  
253 *and the unattended distractor stream for every spatialization condition. The P1 time range was*  
254 *defined between 50 ms and 100 ms, and the N1 time range was defined between 100 ms and 180 ms.*

255 **B.** *Most topographies of both ERP components show maxima at the fronto-central sites (black dots)*  
256 *used for evaluation. C. The modulation strength of ERP components was assessed by the amplitude*  
257 *differences between attended and unattended streams. \*  $P < .05$ ; \*\*  $P < .01$*

258 We tested whether P1 responses were significantly larger to attended stimuli than to unattended stimuli in  
259 each of the three conditions. Only the HRTF condition showed a significant P1 modulation ( $t_{(17)} = 3.12$ ,  
260  $P_{adj} = 0.017$ ); no significant attentional modulation was found in either the ITD ( $t_{(17)} = 0.50$ ,  $P_{adj} = 1$ ) or  
261 IID conditions ( $t_{(17)} = 0.06$ ,  $P_{adj} = 1$ ). Across conditions we found a statistically significant main effect of  
262 spatial cue on P1 amplitude modulation ( $F_{(2,34)} = 3.34$ ,  $P = 0.047$ ). Attentional modulation was  
263 significantly larger in the HRTF condition than in the ITD ( $t_{(34)} = 2.38$ ,  $P = 0.023$ ) and IID conditions  
264 ( $t_{(34)} = 2.07$ ,  $P = 0.046$ ); however, modulation did not differ significantly between the ITD and IID  
265 conditions ( $t_{(34)} = 0.31$ ,  $P = 0.76$ ) (Figure 3C).

266 In all three spatialization conditions, the N1 amplitude was modulated significantly by spatial attention,  
267 that is, attended sounds evoked larger N1 amplitudes than unattended sounds (ITD:  $t_{(17)} = 3.01$ ,  
268  $P_{adj} = 0.024$ ; IID:  $t_{(17)} = 4.12$ ,  $P_{adj} = 0.002$ ; HRTF:  $t_{(17)} = 3.56$ ,  $P_{adj} = 0.007$ ). Across the three spatialization  
269 conditions the magnitude of N1 modulation did not differ significantly ( $F_{(2,34)} = 0.060$ ,  $P = 0.94$ ;  
270 Figure 3C).

271 *3.3 Alpha oscillation power shows less attentional modulation with impoverished spatial cues*  
272 To investigate the effect of spatialization on attentional control, we analyzed the power in alpha  
273 oscillations during the attentional preparation period (-800 ms to 0 ms), a time period in which listeners  
274 knew where to orient spatial attention based on the preceding acoustic cue, but before the sound mixture  
275 of competing streams began. We averaged the power in alpha across all trials for each spatialization  
276 condition, regardless of where spatial attention was focused, to get a measure of the total engagement of  
277 alpha activity. We then compared relative power for different attentional directions. On average across  
278 directions of attentional focus, we calculated the time courses of alpha global field power (GFP, Figure  
279 4A) and compared within-subject differences of the temporal average within the preparatory time period  
280 across spatialization conditions (Figure 4B). Alpha GFP was not significantly modulated in either the ITD  
281 or ILD conditions (ITD:  $t_{(17)} = 0.44$ ,  $P_{adj} = 1$ ; ILD:  $t_{(17)} = 0.43$ ,  $P_{adj} = 1$ ), while in the HRTF condition, the  
282 GFP tended to be greater than zero (HRTF:  $t_{(17)} = 2.56$ ,  $P_{adj} = 0.061$ ). In a direct comparison,  
283 spatialization conditions differed significantly in alpha GFP ( $F_{(2,34)} = 5.26$ ,  $P = 0.010$ ). In particular, alpha  
284 GFP in the HRTF condition was significantly larger than in the other two conditions (HRTF vs ITD:  
285  $t_{(34)} = 2.80$ ,  $P = 0.008$ ; HRTF vs IID:  $t_{(34)} = 2.82$ ,  $P = 0.008$ ). No significant difference was found between  
286 the ITD and IID conditions ( $t_{(34)} = 0.019$ ,  $P = 0.99$ ).



Figure 4

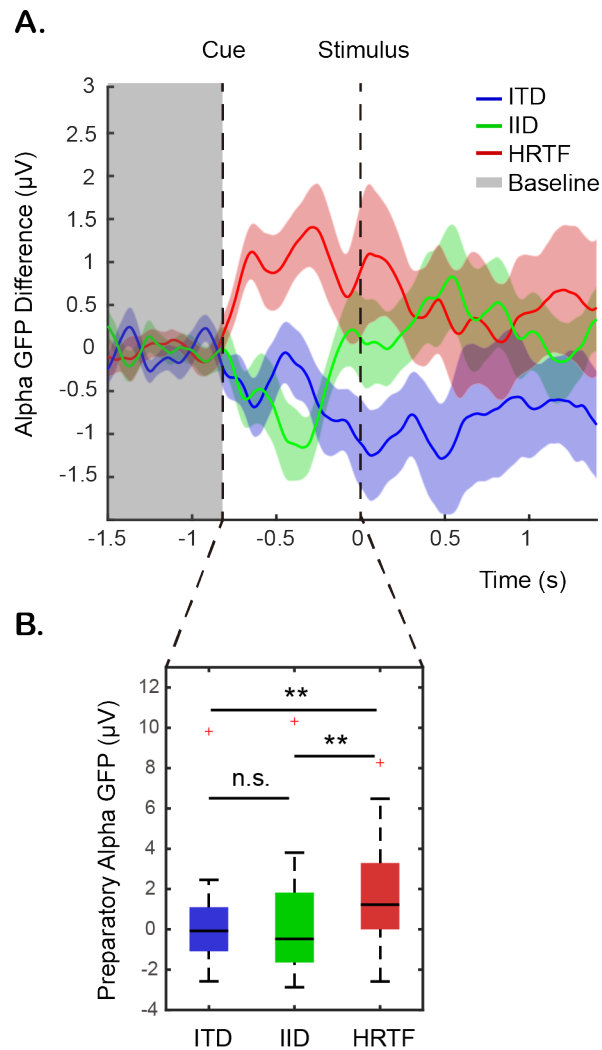

287

288 **Fig. 4.** Within-subject differences in alpha-band GFP are larger in the HRTF condition, especially  
289 during the preparatory time window (after the sound cue but before the first syllables of the  
290 competing streams). **A.** Waveforms of the average ( $\pm$  SEM) GFP differences are shown during the  
291 baseline period, preparatory phase, and stimulus phase with stream competition. **B.** The temporal  
292 average of the preparatory alpha GFP difference is larger for the HRTF condition. \*\*  $P < .01$

293 We next assessed the lateralization of alpha power with the spatial focus of attention by comparing AMI  
294 differences across hemispheres (Figure 5). In general, the scalp topographies of AMIs show the expected  
295 hemispheric differences. However, statistically significant hemispheric differences were found only in the

296 HRTF condition ( $t_{(17)} = 3.09$ ,  $P_{adj} = 0.020$ ), not in the ITD ( $t_{(17)} = 1.29$ ,  $P_{adj} = 0.64$ ) and the IID condition  
297 ( $t_{(17)} = 0.15$ ,  $P_{adj} = 1$ ). A direct comparison of these hemisphere differences across conditions revealed a  
298 trend in which the HRTF condition had larger differences in AMI across hemispheres ( $F_{(2,34)} = 2.98$ ,  
299  $P = 0.064$ ).

Figure 5

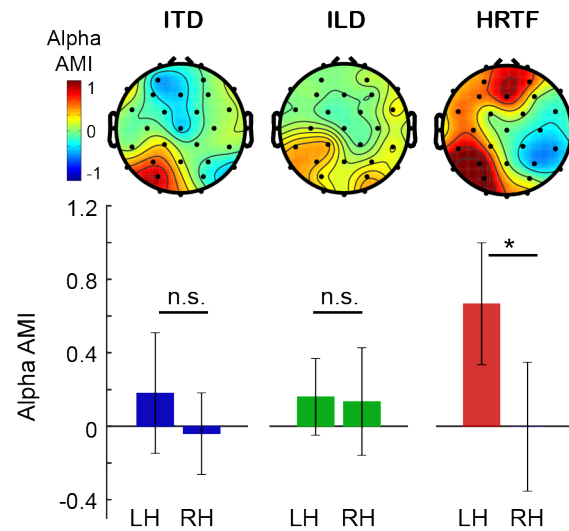

300

301 **Fig. 5.** Attentional modulation of alpha activity was lateralized to the hemisphere ipsilateral to the  
302 target stream only in the HRTF condition. AMI topographies and hemispheric averages are shown  
303 for every spatialization condition ( $N = 18$ ). \*  $P < .05$

304 In summary, impoverished spatial cues lead to worse behavioral performance, smaller P1 modulation,  
305 reduced modulation of preparatory alpha power GFP, and reduced lateralization of alpha power with  
306 attentional focus, confirming our hypothesis that impoverished spatial cues impaired engagement of  
307 spatial attention.

### 308 3.4 Relationships between Attentional Modulation Metrics

309 Given all these consistent effects of modulation metrics, we explored, post hoc, whether there were  
310 ordered relationships in the individual measures of performance and neural signatures of attentional  
311 control, including P1 modulation, preparatory alpha GFP, and alpha power lateralization. To investigate

312 the relationship between evoked response modulation and alpha oscillatory activities, we first calculated  
313 the regression slope relating P1 amplitude to preparatory alpha GFP for each subject, and then performed  
314 a paired t-test on the coefficients obtained. No consistent relationship between alpha GFP and P1  
315 amplitudes was observed ( $t_{(17)} = 0.90$ ,  $P = 0.38$ ). Correlation analysis was also conducted comparing  
316 behavioral accuracy to P1 modulation, defined as the attended P1 amplitude minus unattended P1  
317 amplitude. No consistent relationships between P1 modulation and behavioral performance were observed  
318 for any syllable (1st syllable:  $t_{(17)} = 0.54$ ,  $P = 0.59$ ; 2nd syllable:  $t_{(17)} = 0.31$ ,  $P = 0.76$ ; 3rd syllable:  
319  $t_{(17)} = 0.69$ ,  $P = 0.50$ ). Similarly, we did not observe consistent relationships between alpha AMI  
320 lateralization and response accuracy for any syllable (1st syllable:  $t_{(17)} = 0.19$ ,  $P = 0.85$ ; 2nd syllable:  
321  $t_{(17)} = 1.39$ ,  $P = 0.18$ ; 3rd syllable:  $t_{(17)} = 0.11$ ,  $P = 0.91$ ). Thus, although there were significant  
322 differences in engagement of attention across spatial conditions as measured both behaviorally and  
323 neurally, the individual subject differences in these metrics were not closely related.

## 324 **4 Discussion**

325 Behaviorally, we found that impoverished spatial cues impair performance on an auditory spatial attention  
326 task in a multi-talker scene. We used objective electrophysiological measures to assess whether the  
327 naturalness and richness of spatial cues also impacts how strongly auditory spatial attention modulates  
328 brain responses. We found that impoverished spatial cues reduce the strength of the evoked and induced  
329 neural signatures of attentional control. Specifically, evoked P1 amplitudes and induced alpha oscillatory  
330 power showed less attentional modulation for sound stimuli with impoverished spatial cues compared to  
331 when spatial cues were tailored to recreate the natural, rich experience of individual listeners.

### 332 *4.1 Impoverished spatial cues result in less neural modulation during selective attention*

333 We investigated attentional modulation of four established neural signatures of selective attention: evoked  
334 P1 and N1 amplitudes and induced power and lateralization of alpha oscillation. While attentional  
335 modulation of N1 amplitude was observed in all conditions, attentional modulation of the earlier P1  
336 amplitude was not observed or was significantly weaker in the impoverished cue conditions compared to  
337 the natural cue condition. Similarly, we found less preparatory alpha power activity in the impoverished  
338 spatial cue conditions than in the natural cue condition, reflected by two indexes quantifying the amount  
339 of spatial variability of alpha power: alpha GFP (Figure 4) and AMI (Figure 5). In the ITD and IID  
340 conditions, although there was a hint of preparatory alpha lateralization over parietal sensors, the amount  
341 of lateralization was significantly smaller than in the HRTF condition and did not reach statistical  
342 significance. Preparatory alpha activity during spatial attention tasks has been well documented to form a  
343 specific lateralization pattern in both vision and audition (Banerjee et al., 2011; Kelly, 2006; Sauseng et  
344 al., 2005; Worden et al., 2018), which is thought to be evidence of a preparatory information-gating  
345 mechanism (Foxye and Snyder, 2011; Jensen and Mazaheri, 2010; Klimesch, 2012; Klimesch et al., 2007).  
346 In vision, alpha lateralization has been observed to increase with the laterality of attention focus (Rihs et  
347 al., 2007; Samaha et al., 2015), reflecting an inhibition pattern topographically specific to attention focus.  
348 Moreover, evidence for active top-down control of the phase of alpha oscillation during visual spatial

Deng et al.

Spatial attention with impoverished auditory cues

349 attention suggests that alpha oscillatory activity represents active engagement and disengagement of the  
350 attentional network (Samaha et al., 2016). In addition, a previous somatosensory study has revealed that  
351 the alpha lateralization is positively correlated to pre-stimulus cue reliability, further suggesting that alpha  
352 lateralization reflects the top-down control in order to optimize the processing of upcoming stimuli  
353 (Haegens et al., 2011). Although relatively few studies have investigated alpha activity in audition,  
354 studies suggest that alpha control mechanisms are supra-modal rather than sensory specific (Banerjee et  
355 al., 2011). In the current experiment, a pre-stimulus auditory cue directed listeners where to focus  
356 attention in an upcoming sound mixture. The cue was spatialized using the same auditory features used to  
357 spatialize the stream mixture. Our results thus suggest that compared to stimuli with natural spatial cues,  
358 stimuli featuring only ITDs or only IIDs are less reliable in directing attentional focus, producing weaker  
359 engagement of spatial attention and reduced attentional modulation of neural responses.

360 Consistent with the idea that impoverished spatial cues lead to weaker engagement of spatial attention, we  
361 found that the P1 ERP component was modulated by attention only with natural spatial cues, not with  
362 impoverished cues; this result is consistent with a weak spatial representation failing to engage attentional  
363 modulation of early sensory responses (Figure 3). Our finding that attentional focus leads to a modulation  
364 of P1 amplitude for natural spatial cues is consistent with previous reports of effects of attention on the P1  
365 amplitude observed in previous spatial attention studies across sensory modalities [auditory: (Giuliano et  
366 al., 2014); visual: (Hillyard and Anllo-Vento, 1998; Hopfinger et al., 2004)]. Past studies agree that P1  
367 modulation reflects an early sensory inhibition mechanism related to suppression of task-irrelevant  
368 stimuli. Although debates remain as to whether P1 modulation results from bottom-up sensory gain  
369 control (Hillyard and Anllo-Vento, 1998; Luck, 1995; Slagter et al., 2016) or for some top-down  
370 inhibitory process (Freunberger et al., 2008; Klimesch, 2011), it is generally accepted in visual spatial  
371 studies that greater P1 amplitude modulation is associated with greater inhibition of to-be-ignored stimuli  
372 (Couperus and Mangun, 2010; Hillyard and Anllo-Vento, 1998; Klimesch, 2012). Interestingly,  
373 attentional modulation of auditory P1 has been found to be positively correlated to visual working

Deng et al.

Spatial attention with impoverished auditory cues

374 memory capacity, a result that was used to suggest that stronger P1 modulation reflects better attentional  
375 control of the flow of sensory information into working memory (Fukuda and Vogel, 2009; Giuliano et  
376 al., 2014). Our result is consistent with the hypothesis that P1 modulation directly reflects attentional  
377 control. Specifically, impoverished spatial cues likely produce a “muddy” representation of auditory  
378 space that supports only imprecise, poorly focused top-down spatial attention. The resulting lack of  
379 control and specificity of spatial auditory attention results in early P1 responses that are unmodulated by  
380 attentional focus.

381 N1 modulation is well documented as a neural index of attentional control (Choi et al., 2013; Hillyard et  
382 al., 1998; Stevens et al., 2008; Wyart et al., 2012). The attentional modulation of N1 is thought to reflect  
383 attentional facilitation rather than inhibition (Couperus and Mangun, 2010; Marzecová et al., 2018;  
384 Slagter et al., 2016). In contrast to preparatory alpha and P1, we found that the later N1 evoked response  
385 was modulated similarly, regardless of the richness and naturalness of spatial cues.

386 Due to the robustness and relatively large amount of modulation, changes in auditory N1 amplitude have  
387 been used as a biomarker and a primary feature for classification of attentional focus (Blankertz et al.,  
388 2011; Schreuder et al., 2011); see also recent work on decoding attentional focus for running speech using  
389 the correlation between neural responses and the power envelope of the speech streams: (Chait et al.,  
390 2010; Mesgarani and Chang, 2012; Rimmele et al., 2015). However, there is little known about how N1  
391 amplitudes reflects the processing of different spatial cues during auditory spatial attention. Previous  
392 studies have revealed different N1 topographies during ITD and IID processing, leading to the conclusion  
393 that ITD and IID are processed by different neural populations in the auditory cortex (Johnson and  
394 Hautus, 2010; Tardif et al., 2006; Urgan et al., 2001). However, debates remain about whether this  
395 difference in topography depends on perceived laterality, instead of different neural populations  
396 specialized for processing different spatial cues. Results from a more recent study show that auditory N1  
397 modulation does not differ across spatial cue conditions, indicating integrated processing of sound  
398 locations in auditory cortex regardless of cues (Salminen et al., 2015). In the current study, N1

399 modulation did not differ across the three spatialization conditions. Thus, our results support the idea that  
400 the same cortical neural population is responsible for processing different binaural spatial cues.

401 *4.2 Behavioral disadvantages associated with impoverished spatial cues are modest and depend*  
402 *on sound stimulus characteristics*

403 Despite the influence of spatial cue richness on neural metrics, our behavioral results showed only small  
404 (albeit significant) behavioral differences between impoverished spatial cues and natural, individualized  
405 spatial cues (Figure 2). In line with previous studies that observed greater spatial release from masking  
406 with combined spatial cues compared to with isolated cues (Culling et al., 2004; Ellinger et al., 2017),  
407 accuracy was best in the HRTF condition. The small accuracy improvement over using impoverished  
408 cues is seen consistently across subjects. In the first syllable where the target and distractor streams  
409 overlap in time, the HRTF condition yielded a 13% increase in accuracy over the ITD condition, but is  
410 comparable to performance in the IID condition. In the two staggered syllables, accuracy in the HRTF  
411 condition is greater than in the ITD and IID conditions by only about 6% and 1%, respectively. These  
412 differences in behavioral performance across syllables suggest that the characteristics of sound stimuli  
413 influence the difficulty of the task and may influence the behavioral advantages of having richer, more  
414 robust spatial cues (Kidd et al., 2010). Concordantly, a previous study with complex tone stimuli has  
415 shown much larger differences in behavioral performance of up to 20% (Schröger, 1996), whereas studies  
416 presenting speech stimuli in a multi-talker environment found no behavioral advantage of having  
417 combined cues compared to impoverished cues (Glyde et al., 2013). These behavioral discrepancies, in  
418 combination with our neural findings, indicate that behavioral performance alone is not a sensitive metric  
419 for determining whether cortical networks controlling spatial selective attention are fully engaged.

## 420 **Conclusions**

421 Our results indicate that although impoverished spatial cues can support spatial segregation of speech in a  
422 multi-talker environment, they do not fully engage the brain networks controlling spatial attention and  
423 lead to weak attentional control. Previous auditory studies have provided evidence that impoverished  
424 spatial cues do not evoke the same neural processing mechanisms as natural cue combinations during  
425 localization tasks with single sounds (Callan et al., 2013; Getzmann and Lewald, 2010; Leino et al., 2007;  
426 Palomäki et al., 2005). The current study extends these findings, demonstrating that the efficacy of  
427 higher-level cognitive processing, such as deployment of auditory selective attention, also depends on the  
428 naturalness of spatial cues. Poor attentional control was reflected in limited modulation of neural  
429 biomarkers of attentional processes. These findings suggest that the many past auditory attention studies  
430 using impoverished spatial cues may have underestimated the robust changes in cortical activity  
431 associated with deployment of spatial auditory attention in natural settings. Although impoverished  
432 auditory spatial cues can allow listeners to deploy spatial attention effectively enough to perform well in  
433 simple acoustic scenes, noisy, complex listening environments like those encountered in everyday  
434 environments pose greater challenges to attentional processing. In natural settings, spatial attention may  
435 fail unless attentional control networks are fully engaged. Thus, these results demonstrate the importance  
436 of preserving rich, natural spatial cues in hearing aids and other assistive listening devices.

## 437 **Acknowledgements**

438 We thank Ashvini Meltoke for collecting part of the data, Gerald Kidd Jr. for providing the facilities for  
439 individualized HRTF measurements, and Virginia Best for fruitful discussions. This work was supported  
440 by the Austrian Science Fund (grant J3803-N30 to R.B.) and NICD (grant DC013825 to B.S.-C.).

## 441 **References**

442 Ahveninen, J., Hämäläinen, M., Jääskeläinen, I.P., Ahlfors, S.P., Huang, S., Lin, F.-H., Raij, T., Sams,  
443 M., Vasios, C.E., Belliveau, J.W., 2011. Attention-driven auditory cortex short-term plasticity helps



- 444 segregate relevant sounds from noise. *Proceedings of the National Academy of Sciences* 108, 4182–4187.  
445 <https://doi.org/10.1073/pnas.1016134108>
- 446 Alho, K., Medvedev, S.V., Pakhomov, S.V., Roudas, M.S., Tervaniemi, M., Reinikainen, K., Zeffiro, T.,  
447 Näätänen, R., 1999a. Selective tuning of the left and right auditory cortices during spatially directed  
448 attention. *Cognitive Brain Research* 7, 335–341. [https://doi.org/10.1016/S0926-6410\(98\)00036-6](https://doi.org/10.1016/S0926-6410(98)00036-6)
- 449 Banerjee, S., Snyder, A.C., Molholm, S., Foxe, J.J., 2011. Oscillatory Alpha-Band Mechanisms and the  
450 Deployment of Spatial Attention to Anticipated Auditory and Visual Target Locations: Supramodal or  
451 Sensory-Specific Control Mechanisms? *Journal of Neuroscience* 31, 9923–9932.  
452 <https://doi.org/10.1523/jneurosci.4660-10.2011>
- 453 Baumgartner, R., Reed, D.K., Tóth, B., Best, V., Majdak, P., Colburn, H.S., Shinn-Cunningham, B.,  
454 2017. Asymmetries in behavioral and neural responses to spectral cues demonstrate the generality of  
455 auditory looming bias. *Proceedings of the National Academy of Sciences* 114, 9743–9748.  
456 <https://doi.org/10.1073/pnas.1703247114>
- 457 Blankertz, B., Lemm, S., Treder, M., Haufe, S., Müller, K.-R., 2011. Single-trial analysis and  
458 classification of ERP components — A tutorial. *NeuroImage* 56, 814–825.  
459 <https://doi.org/10.1016/J.NEUROIMAGE.2010.06.048>
- 460 Blauert, J., 1997b. Spatial hearing. *The Psychophysics of Human Sound Localization*, 2nd edition. ed.  
461 MIT-Press, Cambridge, MA.
- 462 Boersma, P., 2001. Praat, a system for doing phonetics by computer. *Glott International* 5, 341–345.
- 463 Brainard, D.H., 1997. The psychophysics toolbox. *Spatial vision* 10, 433–436.
- 464 Callan, A., Callan, D.E., Ando, H., 2013. Neural correlates of sound externalization. *NeuroImage* 66, 22–  
465 27. <https://doi.org/10.1016/j.neuroimage.2012.10.057>
- 466 Chait, M., de Cheveigné, A., Poeppel, D., Simon, J.Z., 2010. Neural dynamics of attending and ignoring  
467 in human auditory cortex. *Neuropsychologia* 48, 3262–3271.  
468 <https://doi.org/10.1016/J.NEUROPSYCHOLOGIA.2010.07.007>
- 469 Cherry, E.C., 1953. Some Experiments on the Recognition of Speech, with One and with Two Ears. *The*  
470 *Journal of the Acoustical Society of America* 25, 975–979. <https://doi.org/10.1121/1.1907229>
- 471 Choi, I., Rajaram, S., Varghese, L.A., Shinn-Cunningham, B.G., 2013. Quantifying attentional  
472 modulation of auditory-evoked cortical responses from single-trial electroencephalography. *Frontiers in*  
473 *Human Neuroscience* 7, 115. <https://doi.org/10.3389/fnhum.2013.00115>
- 474 Couperus, J.W., Mangun, G.R., 2010. Signal enhancement and suppression during visual–spatial selective  
475 attention. *Brain Research* 1359, 155–177. <https://doi.org/10.1016/j.brainres.2010.08.076>
- 476 Cubick, J., Buchholz, J.M., Best, V., Lavandier, M., Dau, T., 2018. Listening through hearing aids affects  
477 spatial perception and speech intelligibility in normal-hearing listeners. *The Journal of the Acoustical*  
478 *Society of America* 144, 2896–2905. <https://doi.org/10.1121/1.5078582>
- 479 Culling, J.F., Hawley, M.L., Litovsky, R.Y., 2004. The role of head-induced interaural time and level  
480 differences in the speech reception threshold for multiple interfering sound sources. *The Journal of the*  
481 *Acoustical Society of America* 116, 1057–1065. <https://doi.org/10.1121/1.1772396>

- 482 Cusack, R., Carlyon, R.P., Robertson, I.H., 2001. Auditory Midline and Spatial Discrimination in Patients  
483 with Unilateral Neglect. *Cortex* 37, 706–709. [https://doi.org/10.1016/S0010-9452\(08\)70620-8](https://doi.org/10.1016/S0010-9452(08)70620-8)
- 484 Dahmen, J.C., Keating, P., Nodal, F.R., Schulz, A.L., King, A.J., 2010. Adaptation to Stimulus Statistics  
485 in the Perception and Neural Representation of Auditory Space. *Neuron* 66, 937–948.  
486 <https://doi.org/10.1016/J.NEURON.2010.05.018>
- 487 Dai, L., Best, V., Shinn-Cunningham, B.G., 2018. Sensorineural hearing loss degrades behavioral and  
488 physiological measures of human spatial selective auditory attention. *Proceedings of the National*  
489 *Academy of Sciences* 201721226. <https://doi.org/10.1073/pnas.1721226115>
- 490 Das, N., Biesmans, W., Bertrand, A., Francart, T., 2016. The effect of head-related filtering and ear-  
491 specific decoding bias on auditory attention detection. *Journal of Neural Engineering* 13, 056014.  
492 <https://doi.org/10.1088/1741-2560/13/5/056014>
- 493 Delorme, A., Makeig, S., 2004. EEGLAB: an open source toolbox for analysis of single-trial EEG  
494 dynamics including independent component analysis. *Journal of Neuroscience Methods* 134, 9–21.  
495 <https://doi.org/10.1016/j.jneumeth.2003.10.009>
- 496 Delorme, A., Sejnowski, T., Makeig, S., 2007. Enhanced detection of artifacts in EEG data using higher-  
497 order statistics and independent component analysis. *NeuroImage* 34, 1443–1449.  
498 <https://doi.org/10.1016/j.neuroimage.2006.11.004>
- 499 Ellinger, R.L., Jakien, K.M., Gallun, F.J., 2017. The role of interaural differences on speech intelligibility  
500 in complex multi-talker environments). *The Journal of the Acoustical Society of America* 141, EL170–  
501 EL176. <https://doi.org/10.1121/1.4976113>
- 502 Foxe, J.J., Snyder, A.C., 2011. The Role of Alpha-Band Brain Oscillations as a Sensory Suppression  
503 Mechanism during Selective Attention. *Frontiers in Psychology* 2, 154.  
504 <https://doi.org/10.3389/fpsyg.2011.00154>
- 505 Freunberger, R., Höller, Y., Griesmayr, B., Gruber, W., Sauseng, P., Klimesch, W., 2008. Functional  
506 similarities between the P1 component and alpha oscillations. *European Journal of Neuroscience* 27,  
507 2330–2340. <https://doi.org/10.1111/j.1460-9568.2008.06190.x>
- 508 Fukuda, K., Vogel, E.K., 2009. Human Variation in Overriding Attentional Capture. *Journal of*  
509 *Neuroscience* 29, 8726–8733. <https://doi.org/10.1523/jneurosci.2145-09.2009>
- 510 Getzmann, S., Lewald, J., 2010. Effects of natural versus artificial spatial cues on electrophysiological  
511 correlates of auditory motion. *Hearing Research* 259, 44–54. <https://doi.org/10.1016/j.heares.2009.09.021>
- 512 Giuliano, R.J., Karns, C.M., Neville, H.J., Hillyard, S.A., 2014. Early Auditory Evoked Potential Is  
513 Modulated by Selective Attention and Related to Individual Differences in Visual Working Memory  
514 Capacity. *Journal of Cognitive Neuroscience*. [https://doi.org/10.1162/jocn\\_a\\_00684](https://doi.org/10.1162/jocn_a_00684)
- 515 Glyde, H., Buchholz, J.M., Dillon, H., Cameron, S., Hickson, L., 2013. The importance of interaural time  
516 differences and level differences in spatial release from masking. *The Journal of the Acoustical Society of*  
517 *America* 134, EL147–EL152. <https://doi.org/10.1121/1.4812441>
- 518 Haegens, S., Handel, B.F., Jensen, O., 2011. Top-Down Controlled Alpha Band Activity in  
519 Somatosensory Areas Determines Behavioral Performance in a Discrimination Task. *Journal of*  
520 *Neuroscience* 31, 5197–5204. <https://doi.org/10.1523/jneurosci.5199-10.2011>

- 521 Hartmann, W.M., Wittenberg, A., 1996. On the externalization of sound images. *J Acoust Soc Am* 99,  
522 3678–88.
- 523 Herrmann, C.S., Knight, R.T., 2001. Mechanisms of human attention: event-related potentials and  
524 oscillations. *Neuroscience & Biobehavioral Reviews* 25, 465–476. [https://doi.org/10.1016/S0149-](https://doi.org/10.1016/S0149-7634(01)00027-6)  
525 [7634\(01\)00027-6](https://doi.org/10.1016/S0149-7634(01)00027-6)
- 526 Higgins, N.C., McLaughlin, S.A., Rinne, T., Stecker, G.C., 2017. Evidence for cue-independent spatial  
527 representation in the human auditory cortex during active listening. *Proceedings of the National Academy*  
528 *of Sciences* 114, E7602–E7611. <https://doi.org/10.1073/pnas.1707522114>
- 529 Hillyard, S.A., Anllo-Vento, L., 1998. Event-related brain potentials in the study of visual selective  
530 attention. *Proceedings of the National Academy of Sciences* 95, 781–787.  
531 <https://doi.org/10.1073/pnas.95.3.781>
- 532 Hillyard, S.A., Vogel, E.K., Luck, S.J., 1998. Sensory gain control (amplification) as a mechanism of  
533 selective attention: electrophysiological and neuroimaging evidence. *Philosophical transactions of the*  
534 *Royal Society of London. Series B, Biological sciences* 353, 1257–70.  
535 <https://doi.org/10.1098/rstb.1998.0281>
- 536 Hopfinger, J., Luck, S., Hillyard, S., 2004. Selective attention: Electrophysiological and neuromagnetic  
537 studies. *The cognitive neurosciences III* 561–574.
- 538 Itoh, K., Yumoto, M., Uno, A., Kurauchi, T., Kaga, K., 2000. Temporal stream of cortical representation  
539 for auditory spatial localization in human hemispheres. *Neuroscience Letters* 292, 215–219.  
540 [https://doi.org/10.1016/S0304-3940\(00\)01465-8](https://doi.org/10.1016/S0304-3940(00)01465-8)
- 541 Jensen, O., Mazaheri, A., 2010. Shaping Functional Architecture by Oscillatory Alpha Activity: Gating  
542 by Inhibition. *Frontiers in Human Neuroscience* 4, 186. <https://doi.org/10.3389/fnhum.2010.00186>
- 543 Johnson, B.W., Hautus, M.J., 2010. Processing of binaural spatial information in human auditory cortex:  
544 Neuromagnetic responses to interaural timing and level differences. *Neuropsychologia* 48, 2610–2619.  
545 <https://doi.org/10.1016/J.NEUROPSYCHOLOGIA.2010.05.008>
- 546 Kelly, S.P., 2006. Increases in Alpha Oscillatory Power Reflect an Active Retinotopic Mechanism for  
547 Distracter Suppression During Sustained Visuospatial Attention. *Journal of Neurophysiology* 95, 3844–  
548 3851. <https://doi.org/10.1152/jn.01234.2005>
- 549 Kidd, G., Mason, C.R., Best, V., Marrone, N., Marrone, N., 2010. Stimulus factors influencing spatial  
550 release from speech-on-speech masking. *The Journal of the Acoustical Society of America* 128, 1965–78.  
551 <https://doi.org/10.1121/1.3478781>
- 552 Klimesch, W., 2012. Alpha-band oscillations, attention, and controlled access to stored information.  
553 *Trends in Cognitive Sciences* 16, 606–617. <https://doi.org/10.1016/J.TICS.2012.10.007>
- 554 Klimesch, W., 2011. Evoked alpha and early access to the knowledge system: The P1 inhibition timing  
555 hypothesis. *Brain Research*. <https://doi.org/10.1016/j.brainres.2011.06.003>
- 556 Klimesch, W., Sauseng, P., Hanslmayr, S., 2007. EEG alpha oscillations: The inhibition-timing  
557 hypothesis. *Brain Research Reviews* 53, 63–88. <https://doi.org/10.1016/j.brainresrev.2006.06.003>
- 558 Kong, L., Michalka, S.W., Rosen, M.L., Sheremata, S.L., Swisher, J.D., Shinn-Cunningham, B.G.,  
559 Somers, D.C., 2014. Auditory Spatial Attention Representations in the Human Cerebral Cortex. *Cerebral*

- 560 Cortex 24, 773–784. <https://doi.org/10.1093/cercor/bhs359>
- 561 Leino, S., May, P.J.C., Alku, P., Liikkanen, L.A., Tiitinen, H., 2007. The contribution of high frequencies  
562 to human brain activity underlying horizontal localization of natural spatial sounds. BMC neuroscience 8,  
563 78. <https://doi.org/10.1186/1471-2202-8-78>
- 564 Lim, S.-J., Wöstmann, M., Obleser, J., 2015. Selective Attention to Auditory Memory Neurally Enhances  
565 Perceptual Precision. Journal of Neuroscience 35, 16094–16104.  
566 <https://doi.org/10.1523/JNEUROSCI.2674-15.2015>
- 567 Loiselle, L.H., Dorman, M.F., Yost, W.A., Cook, S.J., Gifford, R.H., 2016. Using ILD or ITD Cues for  
568 Sound Source Localization and Speech Understanding in a Complex Listening Environment by Listeners  
569 With Bilateral and With Hearing-Preservation Cochlear Implants. Journal of speech, language, and  
570 hearing research : JSLHR 59, 810–8. [https://doi.org/10.1044/2015\\_JSLHR-H-14-0355](https://doi.org/10.1044/2015_JSLHR-H-14-0355)
- 571 Luck, S.J., 1995. Multiple mechanisms of visual-spatial attention: recent evidence from human  
572 electrophysiology. Behavioural Brain Research 71, 113–123. [https://doi.org/10.1016/0166-4328\(95\)00041-0](https://doi.org/10.1016/0166-4328(95)00041-0)
- 574 Majdak, P., Baumgartner, R., Jenny, C., 2019. Formation of three-dimensional auditory space.  
575 arXiv:1901.03990 [q-bio].
- 576 Marzecová, A., Schettino, A., Widmann, A., SanMiguel, I., Kotz, S.A., Schröger, E., 2018. Attentional  
577 gain is modulated by probabilistic feature expectations in a spatial cueing task: ERP evidence. Scientific  
578 Reports 8. <https://doi.org/10.1038/s41598-017-18347-1>
- 579 Mesgarani, N., Chang, E.F., 2012. Selective cortical representation of attended speaker in multi-talker  
580 speech perception. Nature 485, 233–236. <https://doi.org/10.1038/nature11020>
- 581 Middlebrooks, J.C., 2015. Sound localization. Handbook of Clinical Neurology, The Human Auditory  
582 System 129, 99–116. <https://doi.org/10.1016/B978-0-444-62630-1.00006-8>
- 583 Murray, M.M., Brunet, D., Michel, C.M., 2008. Topographic ERP Analyses: A Step-by-Step Tutorial  
584 Review. Brain Topography 20, 249–264. <https://doi.org/10.1007/s10548-008-0054-5>
- 585 Palomäki, K.J., Tiitinen, H., Mäkinen, V., May, P.J.C., Alku, P., 2005. Spatial processing in human  
586 auditory cortex: The effects of 3D, ITD, and ILD stimulation techniques. Cognitive Brain Research 24,  
587 364–379. <https://doi.org/10.1016/j.cogbrainres.2005.02.013>
- 588 Posner, M.I., Snyder, C.R., Davidson, B.J., 1980. Attention and the detection of signals. Journal of  
589 Experimental Psychology: General 109, 160–174. <https://doi.org/10.1037/0096-3445.109.2.160>
- 590 Rihs, T.A., Michel, C.M., Thut, G., 2007. Mechanisms of selective inhibition in visual spatial attention  
591 are indexed by  $\beta$ -band EEG synchronization. European Journal of Neuroscience 25, 603–610.  
592 <https://doi.org/10.1111/j.1460-9568.2007.05278.x>
- 593 Rimmele, J.M., Zion Golumbic, E., Schröger, E., Poeppel, D., 2015. The effects of selective attention and  
594 speech acoustics on neural speech-tracking in a multi-talker scene. Cortex 68, 144–154.  
595 <https://doi.org/10.1016/J.CORTEX.2014.12.014>
- 596 Röder, B., Teder-Sälejärvi, W., Sterr, A., Rösler, F., Hillyard, S.A., Neville, H.J., 1999. Improved  
597 auditory spatial tuning in blind humans. Nature 400, 162–166. <https://doi.org/10.1038/22106>

- 598 Sach, A.J., Hill, N.I., Bailey, P.J., 2000. Auditory spatial attention using interaural time differences.  
599 *Journal of Experimental Psychology: Human Perception and Performance* 26, 717–729.  
600 <https://doi.org/10.1037/0096-1523.26.2.717>
- 601 Salminen, N.H., Takanen, M., Santala, O., Lamminsallo, J., Altoè, A., Pulkki, V., 2015. Integrated  
602 processing of spatial cues in human auditory cortex. *Hearing Research* 327, 143–152.  
603 <https://doi.org/10.1016/J.HEARES.2015.06.006>
- 604 Samaha, J., Bauer, P., Cimaroli, S., Postle, B.R., 2015. Top-down control of the phase of alpha-band  
605 oscillations as a mechanism for temporal prediction. *Proceedings of the National Academy of Sciences of*  
606 *the United States of America* 112, 8439–8444. <https://doi.org/10.1073/pnas.1503686112>
- 607 Samaha, J., Sprague, T.C., Postle, B.R., 2016. Decoding and Reconstructing the Focus of Spatial  
608 Attention from the Topography of Alpha-band Oscillations. *Journal of Cognitive Neuroscience* 28, 1090–  
609 1097. [https://doi.org/10.1162/jocn\\_a\\_00955](https://doi.org/10.1162/jocn_a_00955)
- 610 Sauseng, P., Klimesch, W., Doppelmayr, M., Pecherstorfer, T., Freunberger, R., Hanslmayr, S., 2005.  
611 EEG alpha synchronization and functional coupling during top-down processing in a working memory  
612 task. *Human Brain Mapping* 26, 148–155. <https://doi.org/10.1002/hbm.20150>
- 613 Schreuder, M., Rost, T., Tangermann, M., 2011. Listen, You are Writing! Speeding up Online Spelling  
614 with a Dynamic Auditory BCI. *Frontiers in Neuroscience* 5, 112.  
615 <https://doi.org/10.3389/fnins.2011.00112>
- 616 Schröger, E., 1996. Interaural time and level differences: Integrated or separated processing? *Hearing*  
617 *Research* 96, 191–198. [https://doi.org/10.1016/0378-5955\(96\)00066-4](https://doi.org/10.1016/0378-5955(96)00066-4)
- 618 Shinn-Cunningham, B.G., Kopco, N., Martin, T.J., 2005. Localizing nearby sound sources in a classroom:  
619 Binaural room impulse responses. *The Journal of the Acoustical Society of America* 117, 3100–3115.  
620 <https://doi.org/10.1121/1.1872572>
- 621 Siegel, M., Donner, T.H., Engel, A.K., 2012. Spectral fingerprints of large-scale neuronal interactions.  
622 *Nature Reviews Neuroscience* 13, 121–134. <https://doi.org/10.1038/nrn3137>
- 623 Skrandies, W., 1990. Global field power and topographic similarity. *Brain Topography* 3, 137–141.
- 624 Snyder, J.S., Large, E.W., 2005. Gamma-band activity reflects the metric structure of rhythmic tone  
625 sequences. *Cognitive Brain Research* 24, 117–126. <https://doi.org/10.1016/j.cogbrainres.2004.12.014>
- 626 Stevens, C., Fanning, J., Coch, D., Sanders, L., Neville, H., 2008. Neural mechanisms of selective  
627 auditory attention are enhanced by computerized training: Electrophysiological evidence from language-  
628 impaired and typically developing children. *Brain Research* 1205, 55–69.  
629 <https://doi.org/10.1016/J.BRAINRES.2007.10.108>
- 630 Tardif, E., Murray, M.M., Meylan, R., Spierer, L., Clarke, S., 2006. The spatio-temporal brain dynamics  
631 of processing and integrating sound localization cues in humans. *Brain Research* 1092, 161–176.  
632 <https://doi.org/10.1016/J.BRAINRES.2006.03.095>
- 633 Ungan, P., Yagcioglu, S., Goksoy, C., 2001. Differences between the N1 waves of the responses to  
634 interaural time and intensity disparities: scalp topography and dipole sources. *Clinical Neurophysiology*  
635 112, 485–498. [https://doi.org/10.1016/S1388-2457\(00\)00550-2](https://doi.org/10.1016/S1388-2457(00)00550-2)
- 636 Worden, M.S., Foxe, J.J., Wang, N., Simpson, G. V., 2018. Anticipatory Biasing of Visuospatial

Deng et al.

Spatial attention with impoverished auditory cues

637 Attention Indexed by Retinotopically Specific  $\alpha$ -Bank Electroencephalography Increases over Occipital  
638 Cortex. *The Journal of Neuroscience* 20, RC63–RC63. <https://doi.org/10.1523/jneurosci.20-06->  
639 [j0002.2000](https://doi.org/10.1523/jneurosci.20-06-j0002.2000)

640 Wöstmann, M., Herrmann, B., Maess, B., Obleser, J., 2016. Spatiotemporal dynamics of auditory  
641 attention synchronize with speech. *Proceedings of the National Academy of Sciences* 113, 3873–3878.  
642 <https://doi.org/10.1073/pnas.1523357113>

643 Wyart, V., Dehaene, S., Tallon-Baudry, C., 2012. Early dissociation between neural signatures of  
644 endogenous spatial attention and perceptual awareness during visual masking. *Frontiers in Human*  
645 *Neuroscience* 6, 16. <https://doi.org/10.3389/fnhum.2012.00016>

646
